# Supplementary material for: Has the COVID-19 Pandemic Changed Parental Attitudes and Beliefs Regarding Vaccinating Their Children against the Flu?
Source: Vaccines (Basel). 2023 Sep 24;11(10):1519. doi: 10.3390/vaccines11101519 (PMC10611412; doi:10.3390/vaccines11101519)
Supplement: Supplementary file 1 [file vaccines-11-01519-s001.zip › vaccines-2583212-supplementary.pdf]

## Supplementary Tables

**Supplementary Table S1. Items and internal consistency for assessing measures of the HBM**

| Measures                 | Items                                                                                                                                                          | $\alpha$ |
|--------------------------|----------------------------------------------------------------------------------------------------------------------------------------------------------------|----------|
| Perceived susceptibility | I believe that if I my children will get vaccinated, the likelihood of them getting infected with Flu will decrease                                            | 0.88     |
|                          | I believe that if my children will not get vaccinated, the likelihood of our family and relatives getting infected with Flu will increase                      |          |
| *Perceived severity      | Even if my children will get infected with Flu I do not think it will cause them significant suffering or complications                                        | 0.64     |
|                          | Even if my children will get infected with Flu, the likelihood of them recovering from the disease is very high                                                |          |
| Perceived Benefits       | I believe that the Flu vaccine will be highly effective in preventing my children from experiencing significant complications of the disease                   | 0.92     |
|                          | I believe that if my children will get vaccinated against Flu, the likelihood that they will miss school days (school / kindergarten) will decrease            |          |
|                          | I believe that if my children will get vaccinated against Flu, the likelihood of us (the parents) losing work days will decrease                               |          |
| Perceived barriers       | I am afraid that the Flu vaccine has side effects                                                                                                              | -        |
| Cues to action           | The likelihood of vaccinating my children against Flu will increase if the health minister will express their support for the benefits of vaccinating children | 0.88     |
|                          | The likelihood of vaccinating my children against Flu will increase if my pediatrician will recommend that they be vaccinated                                  |          |
|                          | The likelihood of vaccinating my children against Flu will increase if the vaccine will be administered by the educational system                              |          |
| Attitude                 | I support vaccine and My children are vaccinated according to the standard immunization schedule                                                               | -        |

$\alpha$  Cronbach indicates the internal consistency: **HBM**  $\alpha = 0.86$

Items response scale: 1-6 agreement

\* Negative items were reverse scored

**Supplementary Table S2: Comparing the sample and the entire population in terms of the characteristics used for sampling: age, gender, level of religiosity, and geographical area**

| <b>Sociodemographic</b>        | <b>Population</b> | <b>sample<br/>(n=1012)</b> |     |
|--------------------------------|-------------------|----------------------------|-----|
|                                | %                 | N                          | %   |
| <b>Age group *</b>             |                   |                            |     |
| 18-39                          | 58%               | 617                        | 63% |
| 40-60                          | 42%               | 358                        | 37% |
| <b>Gender *</b>                |                   |                            |     |
| Male                           | 50%               | 467                        | 48% |
| Female                         | 50%               | 505                        | 52% |
| <b>Level of religiosity **</b> |                   |                            |     |
| Secular                        | 45%               | 417                        | 43% |
| Traditional                    | 25%               | 247                        | 25% |
| Religious                      | 16%               | 128                        | 13% |
| Haredi                         | 14%               | 101                        | 10% |
| <b>Geographical area **</b>    |                   |                            |     |
| <i>Jerusalem District</i>      | 11%               | 93                         | 9%  |
| <i>Northern District</i>       | 9%                | 124                        | 12% |
| <i>Haifa District</i>          | 11%               | 159                        | 16% |
| <i>Central District</i>        | 29%               | 271                        | 27% |
| <i>Tel Aviv District</i>       | 20%               | 168                        | 17% |
| <i>Southern District</i>       | 14%               | 146                        | 14% |
| <i>Judea and Samaria Area</i>  | 6%                | 48                         | 5%  |

\* Jewish population, ages 18-60 (n=3.4 million)

\*\* Jewish population, all ages (n=6.4 million)

**Supplementary Table S3:** Reasons for the reluctance to vaccinate children against the flu (n = 967 reasons provided by the 435 parents didn't vaccinate and don't intend to vaccinate their children against the flu in the winter of 2023)

| <b>Reasons for reluctance to vaccinate children against the flu</b> | <b>n</b> | <b>%</b> |
|---------------------------------------------------------------------|----------|----------|
| <b>I am afraid of the side effects of the vaccine</b>               | 272      | 28%      |
| I believe that the vaccine is not effective                         | 212      | 22%      |
| The natural vaccine protects more than an injected vaccine          | 164      | 17%      |
| Lack of trust in the Ministry of Health                             | 128      | 13%      |
| Lack of trust in pharmaceutical companies and vaccines              | 128      | 13%      |
| I am against all types of vaccines in general                       | 29       | 3%       |
| Inaccessibility                                                     | 21       | 2%       |
| Medical contraindication (sensitivity to the vaccine)               | 13       | 1%       |

Respondents could provide more than one reason for the reluctance to vaccinate children against the flu in the winter of 2023. Hence, the number of reasons is larger than the number of respondents
